# Supplementary material for: Fluorescence imaging of cellular GSH to reveal the hindering influence of rutin on ferroptosis
Source: Royal Society of Chemistry journal article supplement (doi:10.1039/d4nj00397g), 2024-01-01
Supplement: d4nj00397g1.pdf [file d4nj00397g1.pdf]

**Fluorescence imaging of cellular GSH to reveal the hindering influence of rutin on ferroptosis**

Abdul Hadi Mehmood, Chang Jia, Yan Wang, Shijing Li, Ma jia le, Baoli Dong, Hong Liu

School of Chemistry and Chemical Engineering, University of Jinan, Jinan, Shandong 250022, China

\* Corresponding Author, E-mail address: ifp\_dongbl@ujn.edu.cn (B. Dong).

## Table of Contents

|                                   |        |
|-----------------------------------|--------|
| 1. Materials and instruments..... | S3     |
| 2. Cytotoxicity experiment.....   | S3     |
| 3. Fig. S1-S18.....               | S4-S13 |

## 1. Materials and instruments

All solvents and reagents were commercially available and used without further purification. Doubly distilled water was used in all the experiments. Thin-layer chromatography (TLC) analysis was performed on silica gel plates and column chromatography was conducted over silica gel (mesh 200-300), both of which were purchased from the Qingdao Ocean Chemicals. Fluorescence spectra and relative fluorescence intensity were measured with a Hitachi F-4600 spectrofluorimeter with a 10 mm quartz cuvette. UV/vis spectra were obtained with a Shimadzu UV-2700 spectrophotometer. High-resolution mass spectra (HRMS) for the characterization of structures were collected using a Bruker apex-Ultra mass spectrometer (Bruker Daltonics Corp., USA) in electrospray ionization (ESI) mode.  $^1\text{H}$  and  $^{13}\text{C}$  NMR spectra were recorded on an AVANCE III 400 MHz Digital NMR Spectrometer, using tetramethylsilane (TMS) as internal reference. LC-MS were collected using an Agilent 6510 Q-TOF LC/MS.

## 2. Cytotoxicity experiment

Exploited by standard MTT assay the cell viability of the probe **N-GSH** was judged. The HeLa cells inoculated in 96-well plates of density around 8000 cells/well. The HeLa cells were bred overnight down the medium of 100  $\mu\text{L}$  along with consistency of various concentrations (0-50M) of the probe **N-GSH** for 24 hrs. 10  $\mu\text{L}$  MTT was individually inserted to several wells for additional 3 hours incubation. Subsequently, 100  $\mu\text{L}$  of DMSO was practiced for the dissolving of resulted-precipitate, thereafter the plate was shaken for 40 mints. The micro-plate reader (Thermo Fisher Scientific) was operated to determine the absorbance of resultant-solution and to estimate the cytotoxicity for the probe **N-GSH**.

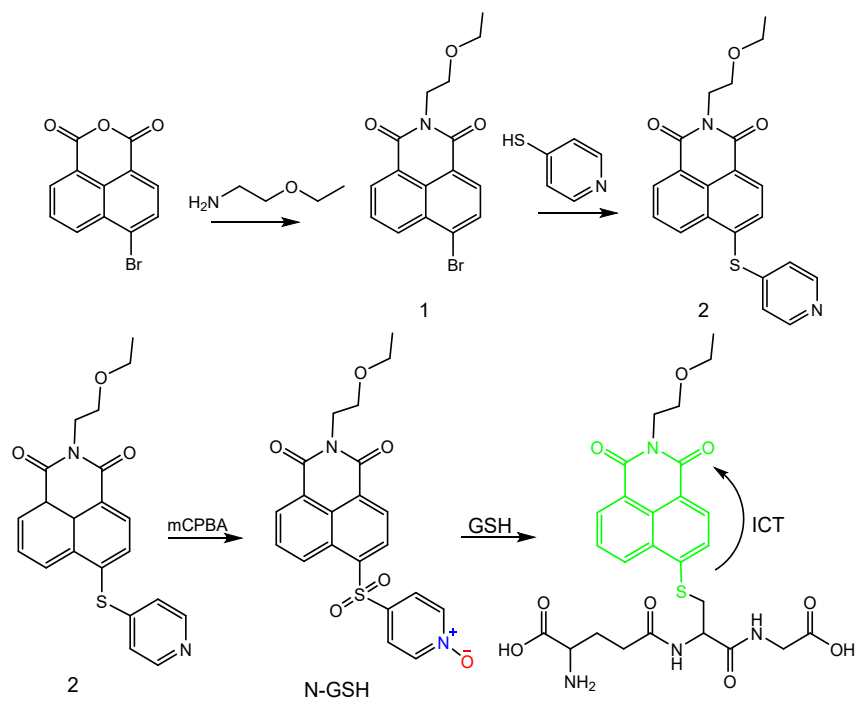

Figure S1. Synthesis route of probe N-GSH.

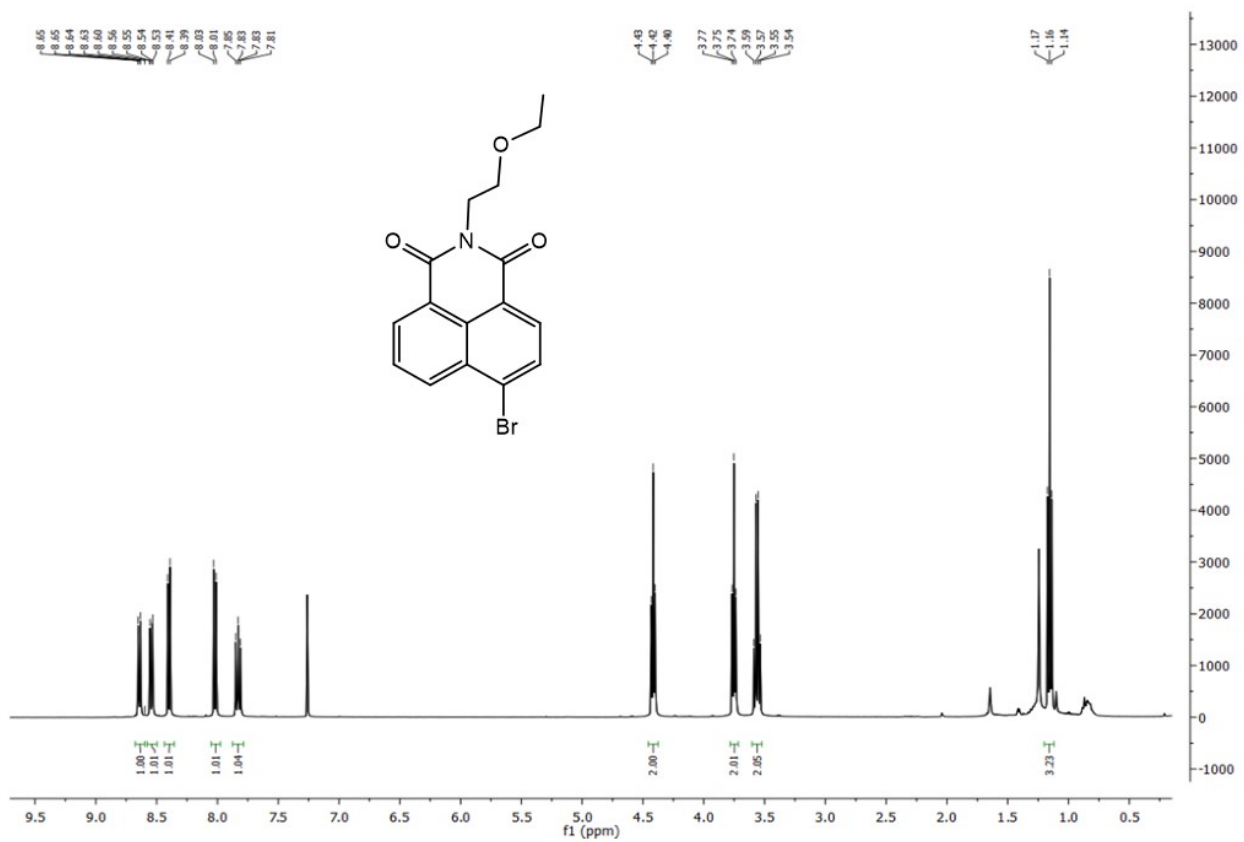

Figure S2. <sup>1</sup>H NMR of compound 1.

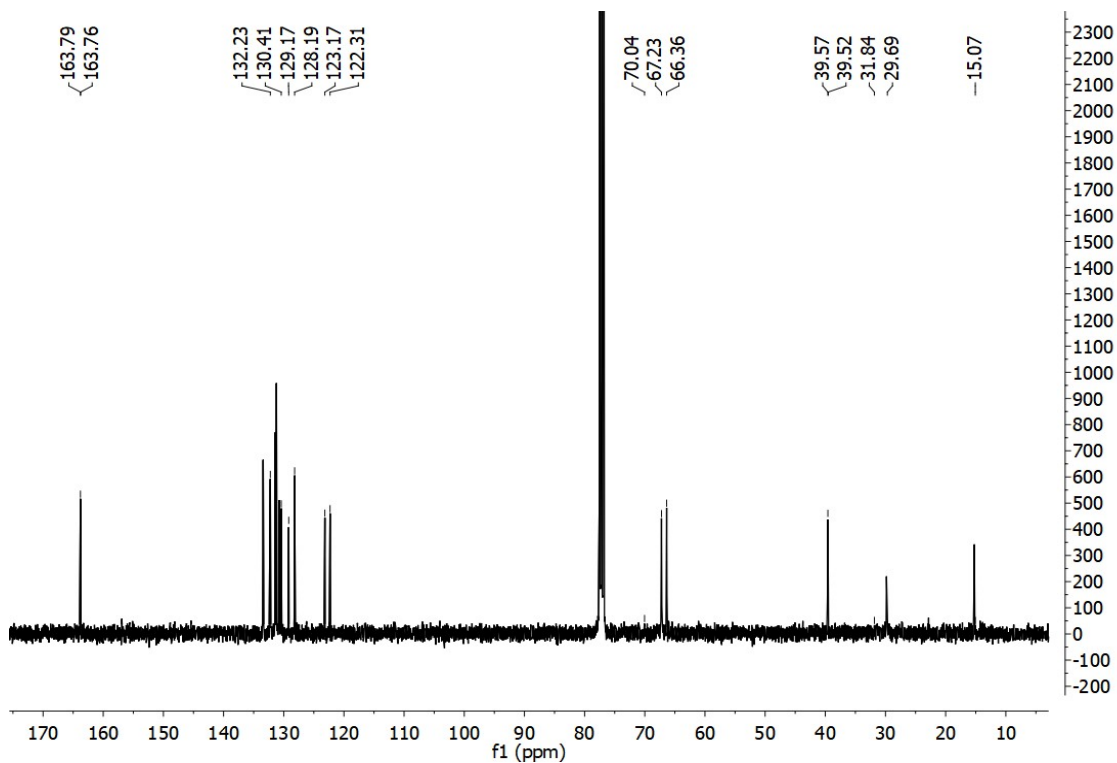

Figure S3. CNMR of compound 1.

A. HPLC data:

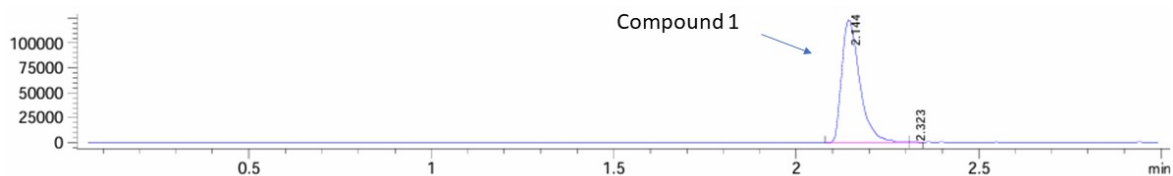

B. MS data:

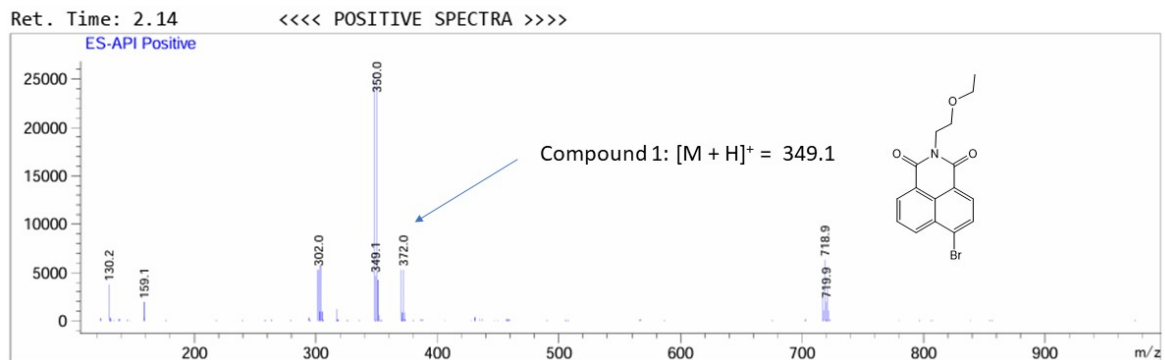

Figure S4. LCMS data of compound 1, Detection at 214 nm.

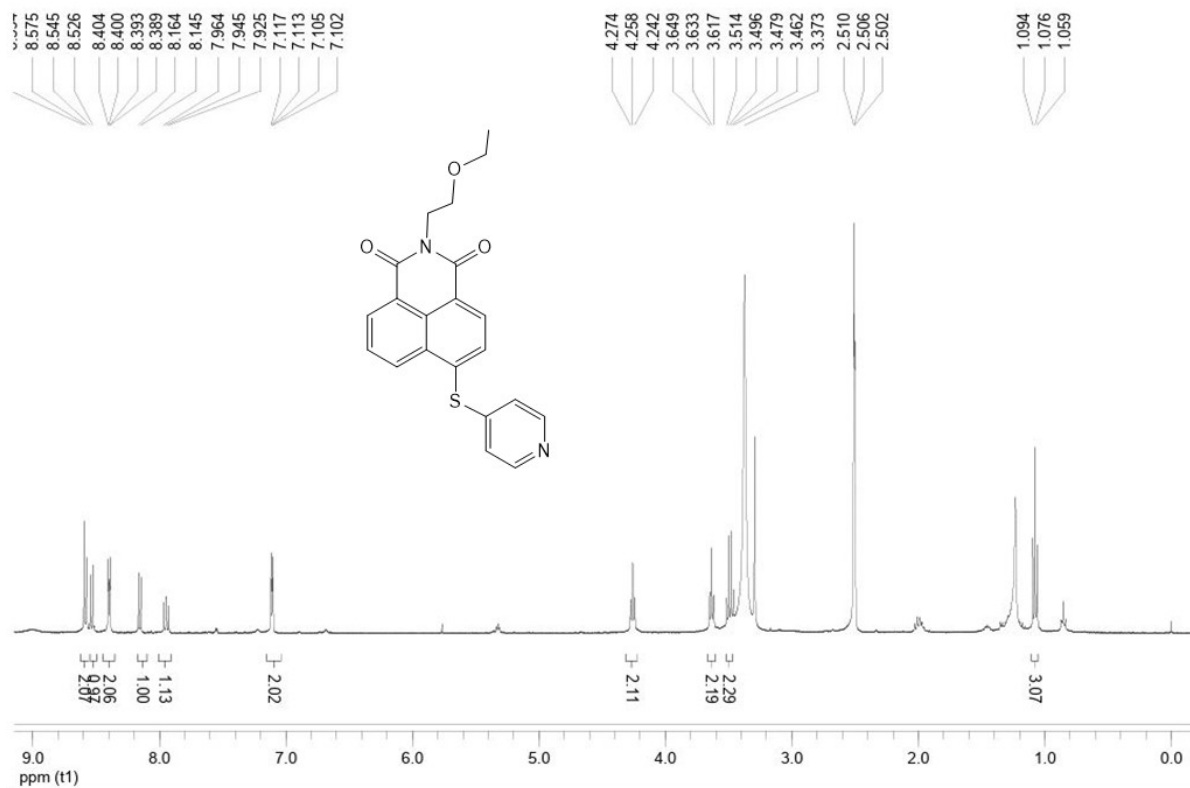

Figure S5. <sup>1</sup>H NMR of compound 2.

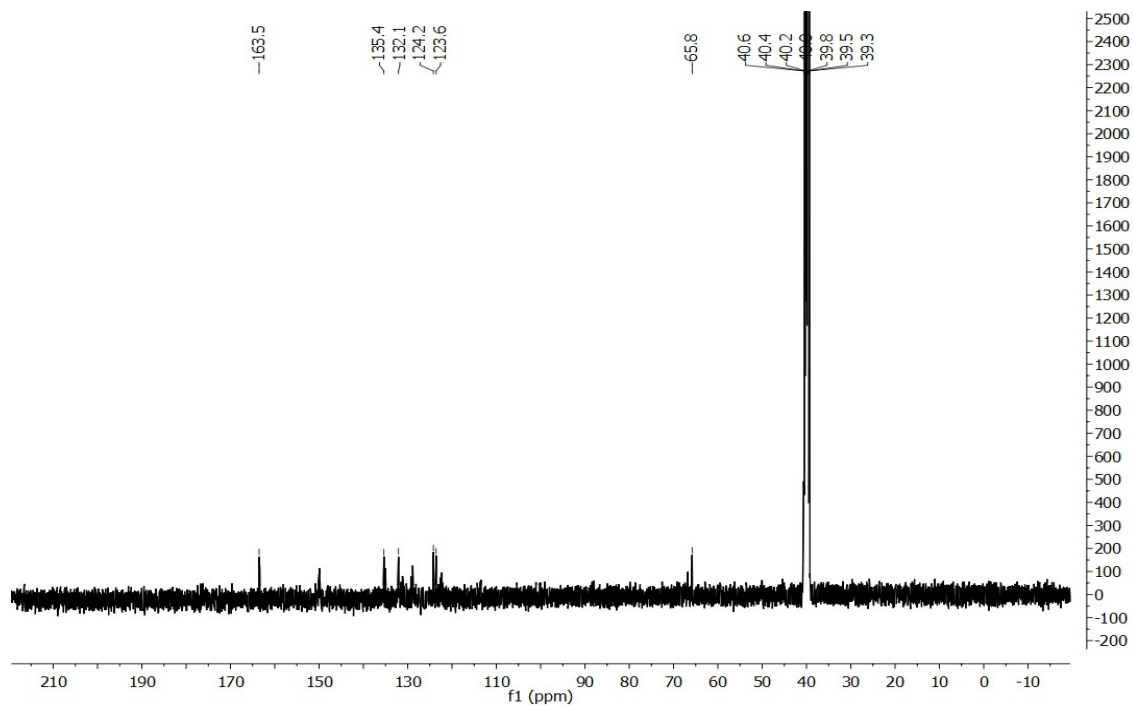

Figure S6. <sup>13</sup>C NMR of compound 2.

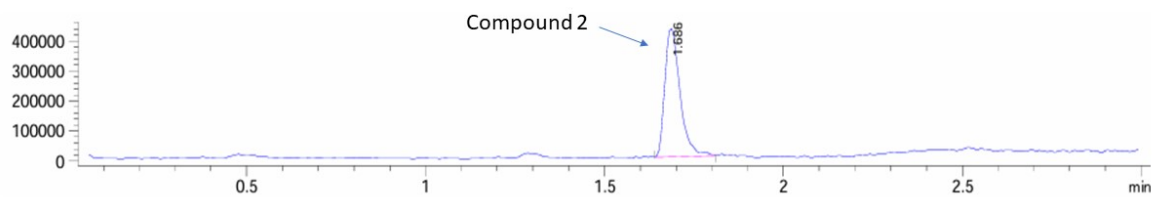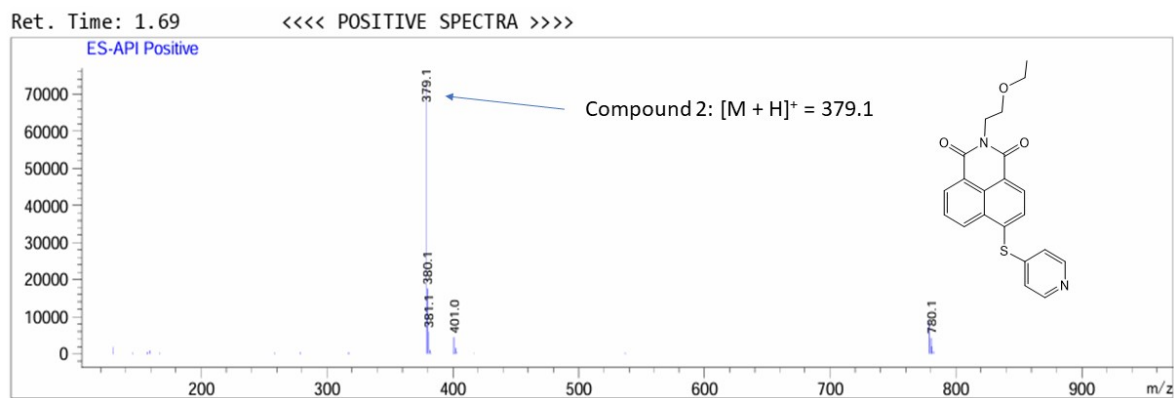

Figure S7. LCMS data of compound 2.

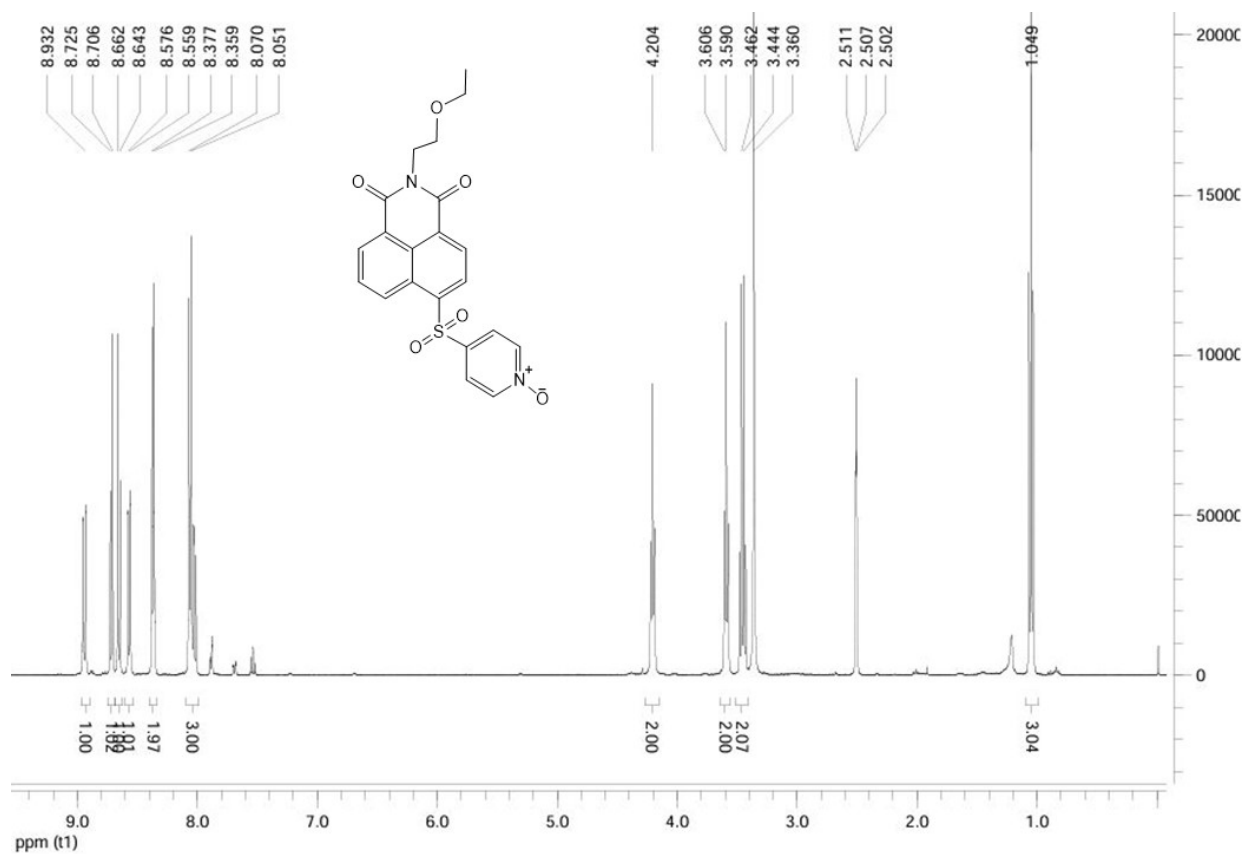

Figure S8. <sup>1</sup>H NMR of probe N-GSH.

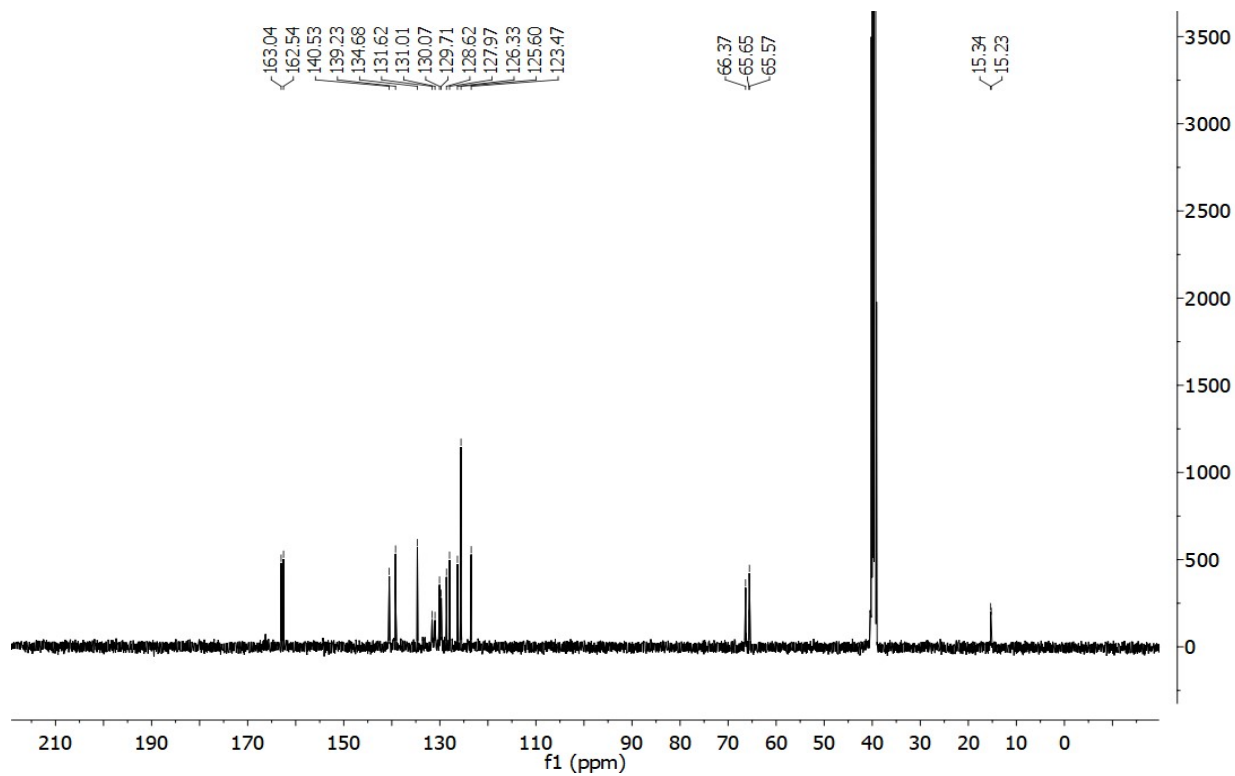

Figure S9. CNMR of probe N-GSH.

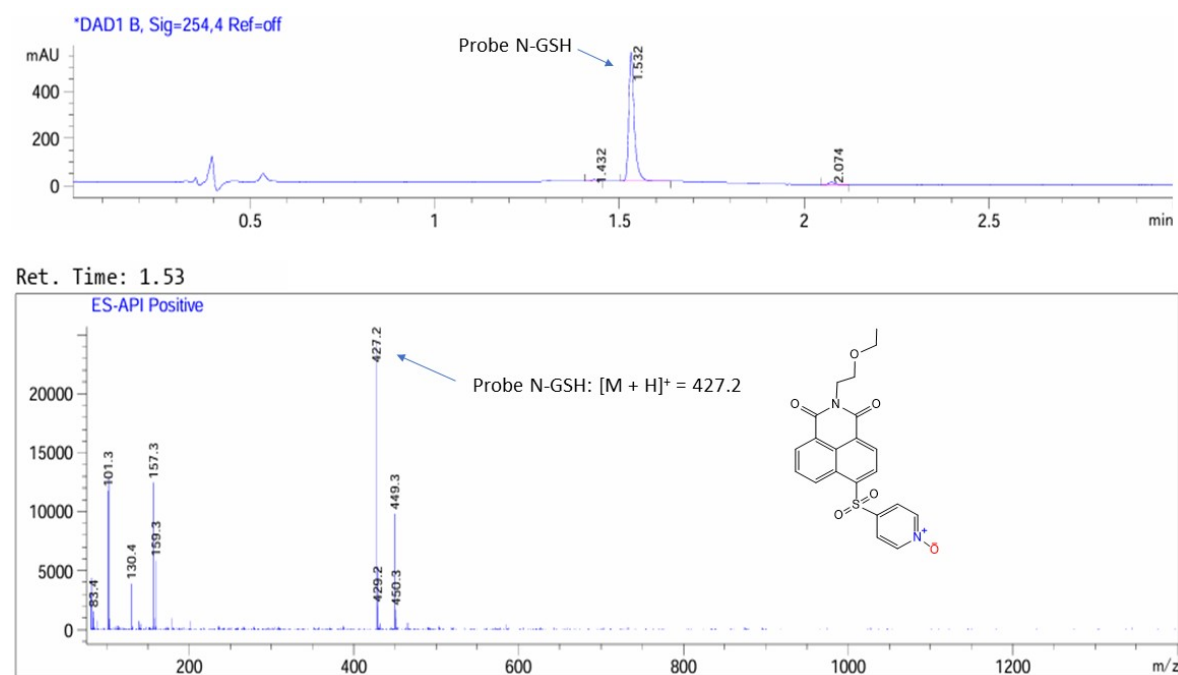

Figure S10. LC-MS data of probe N-GSH.



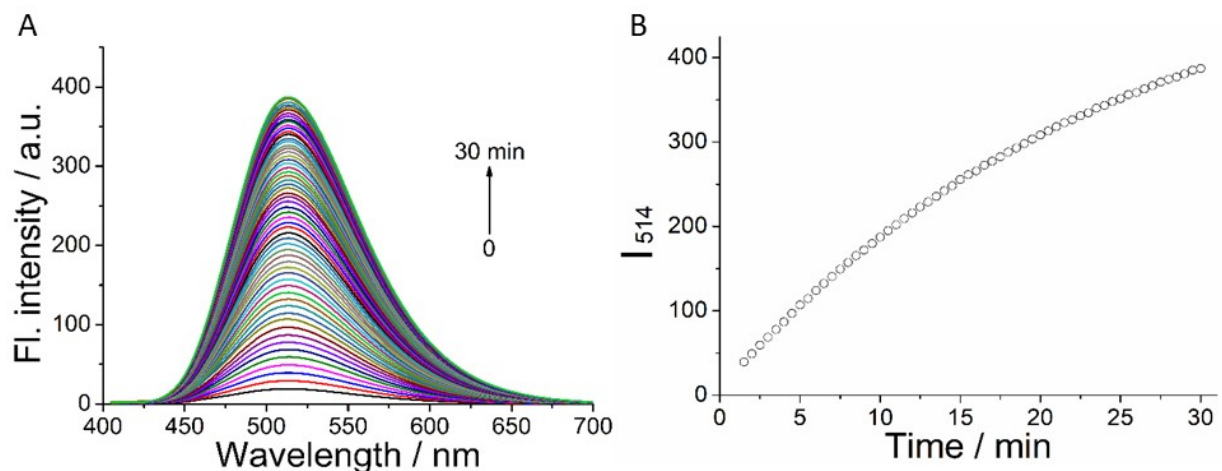

Figure S11. Time-dependent fluorescence spectra **A.** and fluorescence intensity ( $I_{514}$ ) **B.** of  $5\ \mu\text{M}$  N-GSH treated with  $3\ \text{mM}$  GSH in PBS ( $20\ \text{mM}$ ,  $\text{pH}\ 7.4$ ,  $5\% \text{ MeOH}$ ).

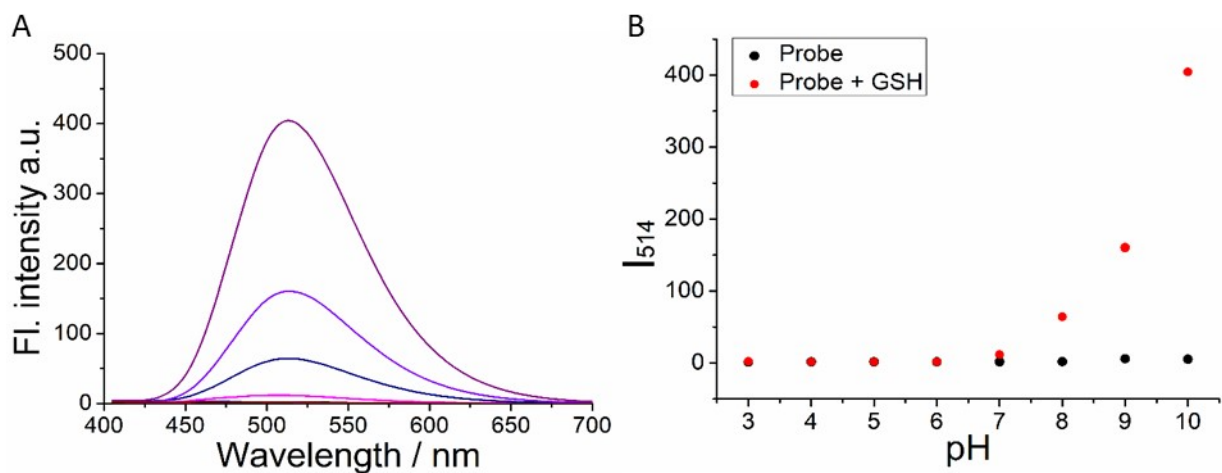

Figure S12. **A.** Fluorescence spectra of  $5\ \mu\text{M}$  N-GSH at various pH. **B.** Fluorescence spectra of  $5\ \mu\text{M}$  N-GSH treated with  $100\ \mu\text{M}$  GSH at various pH. (C) Quantified fluorescence intensity ( $I_{514}$ ) for (A) and (B).  $\lambda_{\text{ex}} = 405\ \text{nm}$ .

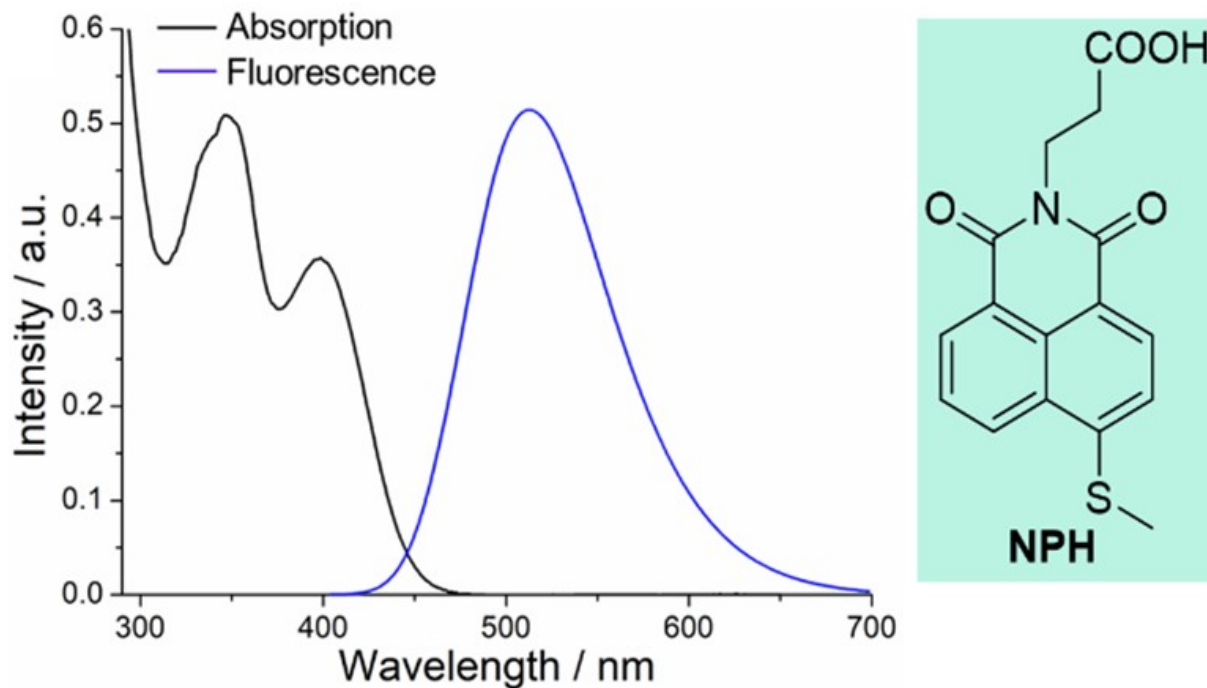

Figure S13. Normalized absorption and fluorescence spectrum of NPH.

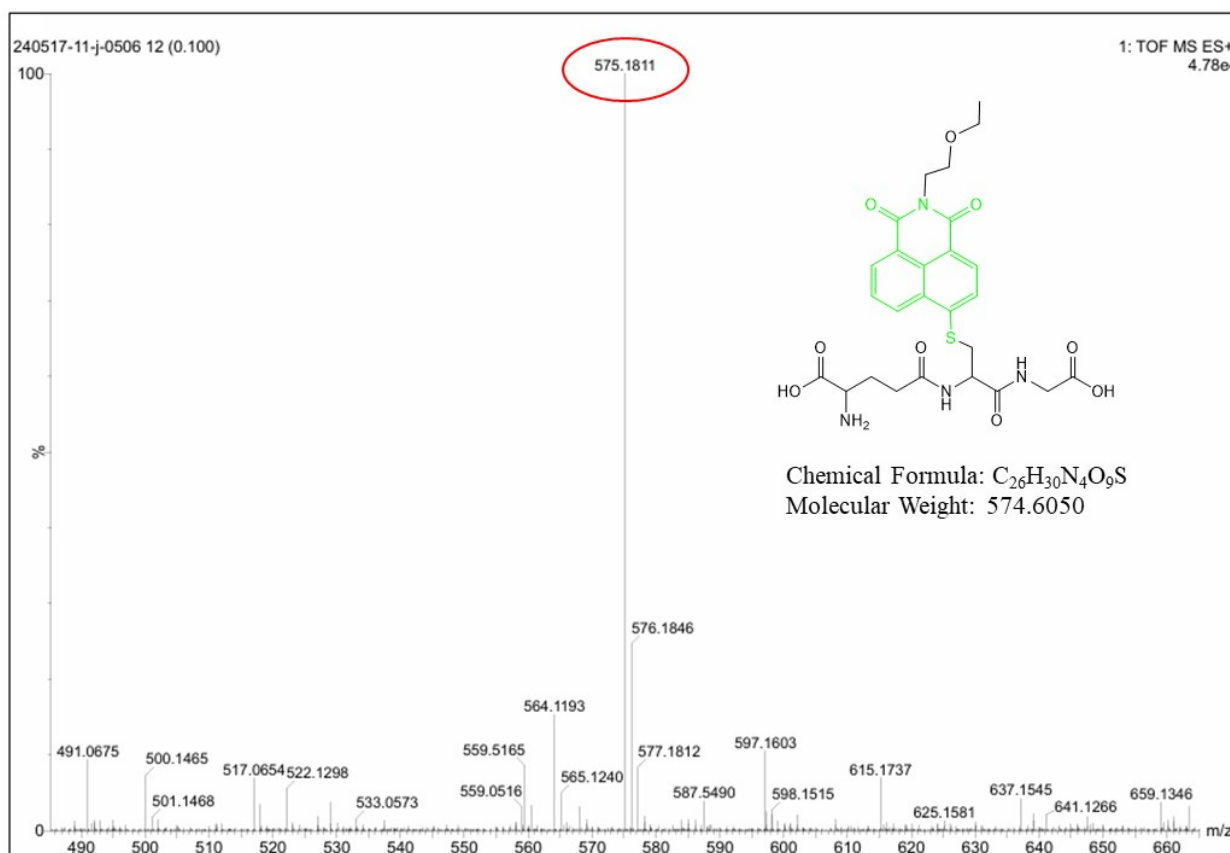

Figure S14. HRMS data of the probe N-GSH to GSH.

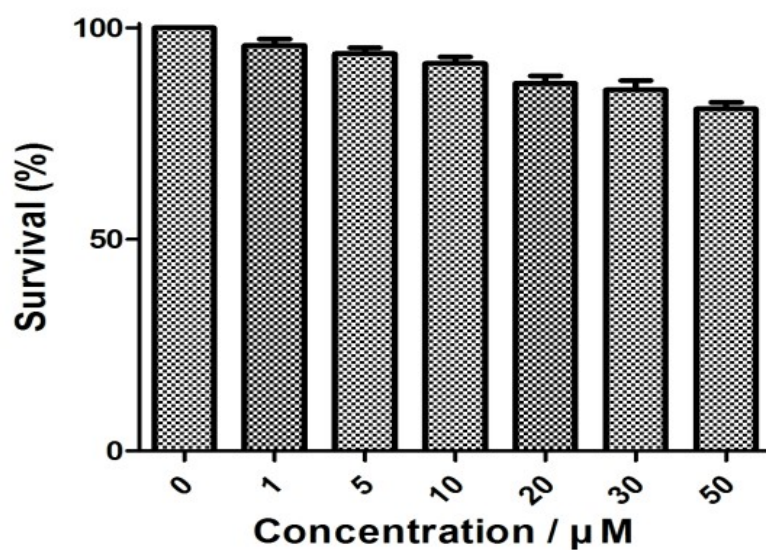

Figure S15. Viability of HeLa cells treated with various concentrations of the probe N-GSH.

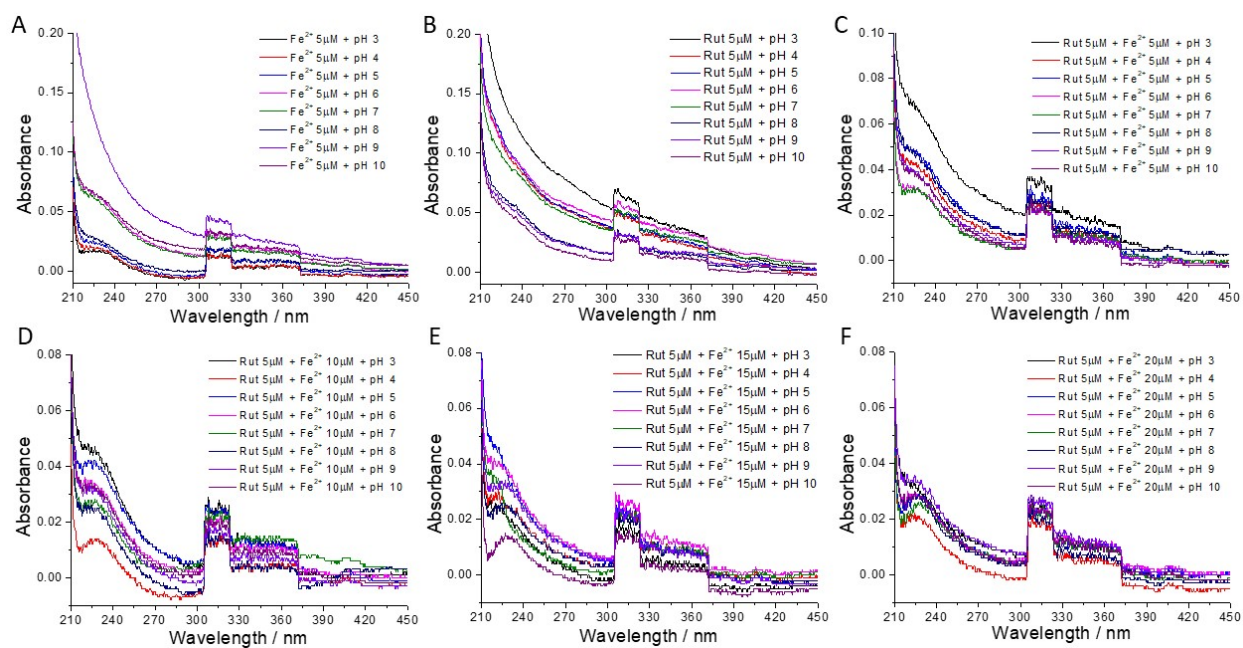

Figure S16. Absorbance spectrum of 5  $\mu\text{M}$  Rutin/ $\text{Fe}^{2+}$  with various concentrations and pH 3-10.

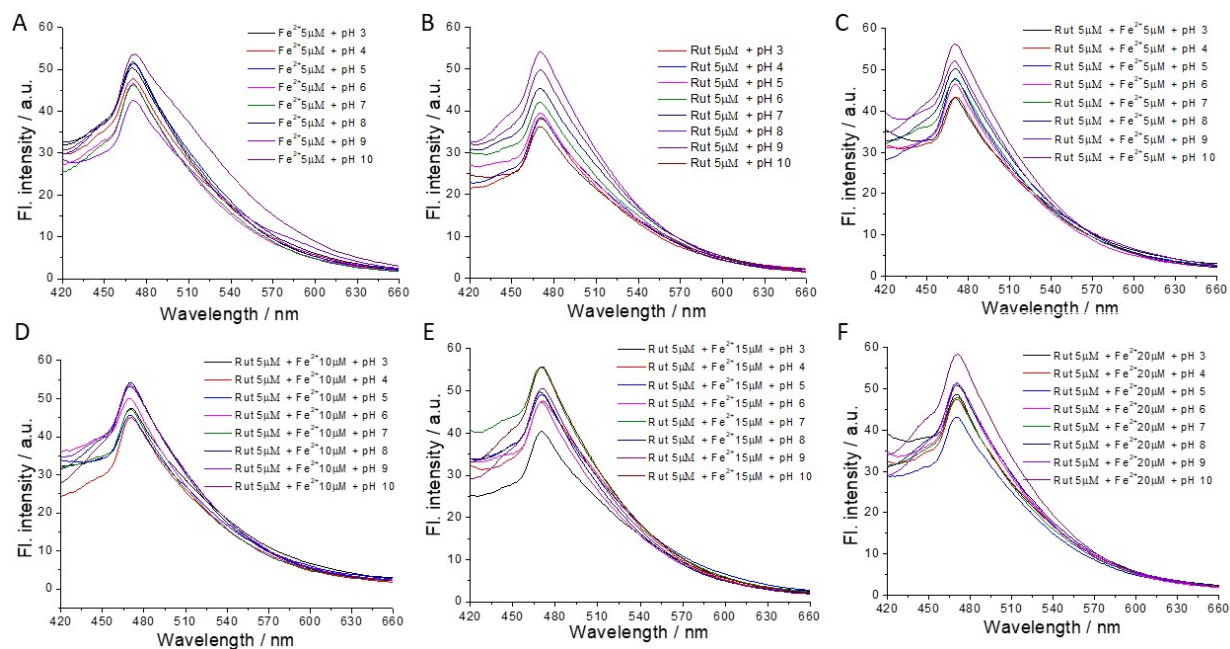

Figure S17. Fluorescence spectrum of 5  $\mu\text{M}$  Rutin/ $\text{Fe}^{2+}$  with various concentrations and pH 3-10.

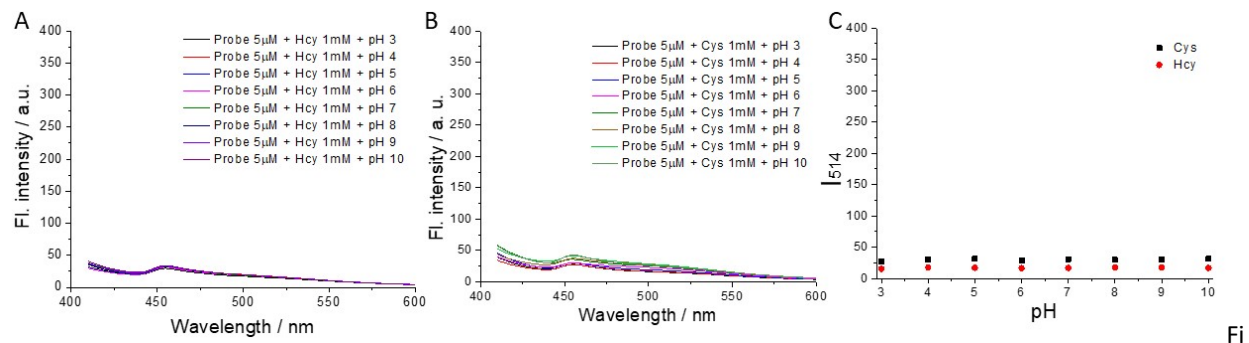

Figure S18. (A) Fluorescence spectra of 5  $\mu\text{M}$  probe N-GSH treated with 1 mM Hcy at various pH (3-10). (B) Fluorescence spectra of 5  $\mu\text{M}$  probe N-GSH treated with 1 mM Cys at various pH. (C) Quantified fluorescence intensity ( $I_{514}$ ) of N-GSH with Hcy and Cys at various pH (3-10).
